# Supplementary material for: Glucose and fatty acids catabolism during in vitro decidualization of human endometrial stromal cells
Source: PubMed Central journal article supplement (PMC9790837; doi:10.1007/s10815-022-02637-3), 2022-10-29
Supplement: 10815_2022_2637_MOESM1_ESM.pdf [file 10815_2022_2637_MOESM1_ESM.pdf]

| <b>Gene</b> | <b>Catalog Number</b> |
|-------------|-----------------------|
| IHD2        | Hs00953879_m1         |
| SDHA        | Hs00188166_m1         |
| FH          | Hs00264683_m1         |
| PDHA1       | Hs01049345_g1         |
| LDHA        | Hs01378790_g1         |
| CTP1A       | Hs00912671_m1         |
| CPT2        | Hs00988962_m1         |
| GLUT1       | Hs00892681_m1         |
| GLUT3       | Hs00359840_m1         |
| G6PD        | Hs00166169_m1         |

**Supplemental Table S1.** Detailed list of primers used (Taqman technology, Life Technologies GmbH, Darmstadt, Germany).
